# Supplementary material
Source: HighWire-hosted journal article supplement (https://www.cmajopen.ca/highwire/filestream/84917/field_highwire_adjunct_files/0/2020-0122-1-at.pdf)
Supplement: 2020-0122-1-at.pdf [file 2020-0122-1-at.pdf]

## Appendix 1 (as supplied by the authors): List of Included Oral Antibiotics

| <b>Oral Antibiotic</b>        | <b>Classification</b>                    |
|-------------------------------|------------------------------------------|
| Amoxicillin                   | Penicillin                               |
| Amoxicillin-clavulanate       | Penicillin with Beta-Lactamase Inhibitor |
| Ampicillin                    | Penicillin                               |
| Azithromycin                  | Macrolide                                |
| Cefaclor                      | Cephalosporin - 2nd/3rd Generation       |
| Cefadroxil                    | Cephalosporin - 1st Generation           |
| Cefdinir                      | Cephalosporin - 2nd/3rd Generation       |
| Cefixime                      | Cephalosporin - 2nd/3rd Generation       |
| Cefpodoxim                    | Cephalosporin - 2nd/3rd Generation       |
| Cefprozil                     | Cephalosporin - 2nd/3rd Generation       |
| Ceftibuten                    | Cephalosporin - 2nd/3rd Generation       |
| Cefuroxime                    | Cephalosporin - 2nd/3rd Generation       |
| Cephalexin                    | Cephalosporin - 1st Generation           |
| Ciprofloxacin                 | Fluoroquinolone                          |
| Clarithromycin                | Macrolide                                |
| Clindamycin                   | Lincosomide                              |
| Cloxacillin                   | Penicillin                               |
| Doxycycline                   | Tetracycline                             |
| Erythromycin                  | Macrolide                                |
| Fidaxomicin                   | Other antibiotic                         |
| Fosfomicin                    | Other antibiotic                         |
| Gemifloxacin                  | Fluoroquinolone                          |
| Levofloxacin                  | Fluoroquinolone                          |
| Linezolid                     | Other antibiotic                         |
| MetroNIDAZOLE                 | Metronidazole                            |
| Minocycline                   | Tetracycline                             |
| Moxifloxacin                  | Fluoroquinolone                          |
| Nitrofurantoin                | Nitrofurantoin                           |
| Norfloxacin                   | Fluoroquinolone                          |
| Ofloxacin                     | Fluoroquinolone                          |
| Penicillin V potassium        | Penicillin                               |
| SulfADIAZINE                  | Trimethoprim and/or Sulphonamide         |
| Sulfamethoxazole              | Trimethoprim and/or Sulphonamide         |
| Sulfamethoxazole-trimethoprim | Trimethoprim and/or Sulphonamide         |
| Telithromycin                 | Macrolide                                |
| Tetracycline                  | Tetracycline                             |
| Trimethoprim                  | Trimethoprim and/or Sulphonamide         |
| Vancomycin                    | Other antibiotic                         |
